# Supplementary material for: Photoinduced Ba2+ release and thermal rebinding by an azacrown ether linked by an alkynyl pyridine to a (bpy)Re(CO)3 groupElectronic supplementary information (ESI) available: analytical data. See http://www.rsc.org/suppdata/cc/b3/b309436g/
Source: Royal Society of Chemistry journal article supplement (doi:10.1039/b309436g), 2003-01-01
Supplement: b309436g.doc [file b309436g.doc]

**Supplementary Data**

**Photoinduced Ba2+ release and thermal rebinding by an azacrown ether linked by an alkynyl pyridine to a (bpy)Re(CO)3 group**

**Jared D. Lewis and John N. Moore***

*Department of Chemistry, The University of York, Heslington, York YO10 5DD, UK.*

**Analytical data**

**Complex 1.** 1H NMR (270 MHz, CDCl3)  3.5-3.7 (m, 20H, aliphatic crown), 6.54 (d, 2H, *J* 8.1 Hz, Ar), 7.22 (d, 2H, *J* 6.5 Hz, pyridyl), 7.29 (d, 2H, *J* 8.1 Hz, Ar), 7.72 (t, 2H, *J* 5.4 Hz, bpy) 7.95 (d, 2H, *J* 6.5 Hz, pyridyl), 8.26 (t, 2H, *J* 8.1 Hz, bpy), 8.54 (d, 2H, *J* 8.1 Hz, bpy), 9.05 (d, 2H, *J* 5.4 Hz, bpy); ESI MS *m/z* (relative intensity %) 823 (M+, C36H36N4O7Re, 100).Anal. Calcd for C36H36N4O7RePF6: C, 44.67; H, 3.75; N, 5.79. Found: C, 44.21; H, 3.77; N, 5.68.

**Complex 2.** 1H NMR (270 MHz, CDCl3)  7.21 (m, 7H, Ar, pyridyl), 7.72 (t, 2H, *J* 5.4 Hz, bpy), 8.19 (t, 2H, *J* 8.1 Hz, bpy), 8.27 (d, 2H, *J* 6.7 Hz, pyridyl), 8.45 (d, 2H, *J* 8.1 Hz, bpy), 9.19 (d, 2H, *J* 5.4 Hz, bpy); ESI MS *m/z* (relative intensity %) 606 (M+, C26H16N3O3Re, 100). Anal. Calcd for C26H16N3O3RePF6: C, 41.60; H, 2.28; N, 5.60. Found: C, 41.54; H, 2.34; N, 5.63.
